# Supplementary material
Source: MDPI journal article supplement (https://www.mdpi.com/2073-4441/12/9/2632)
Supplement: s1 [file s1]

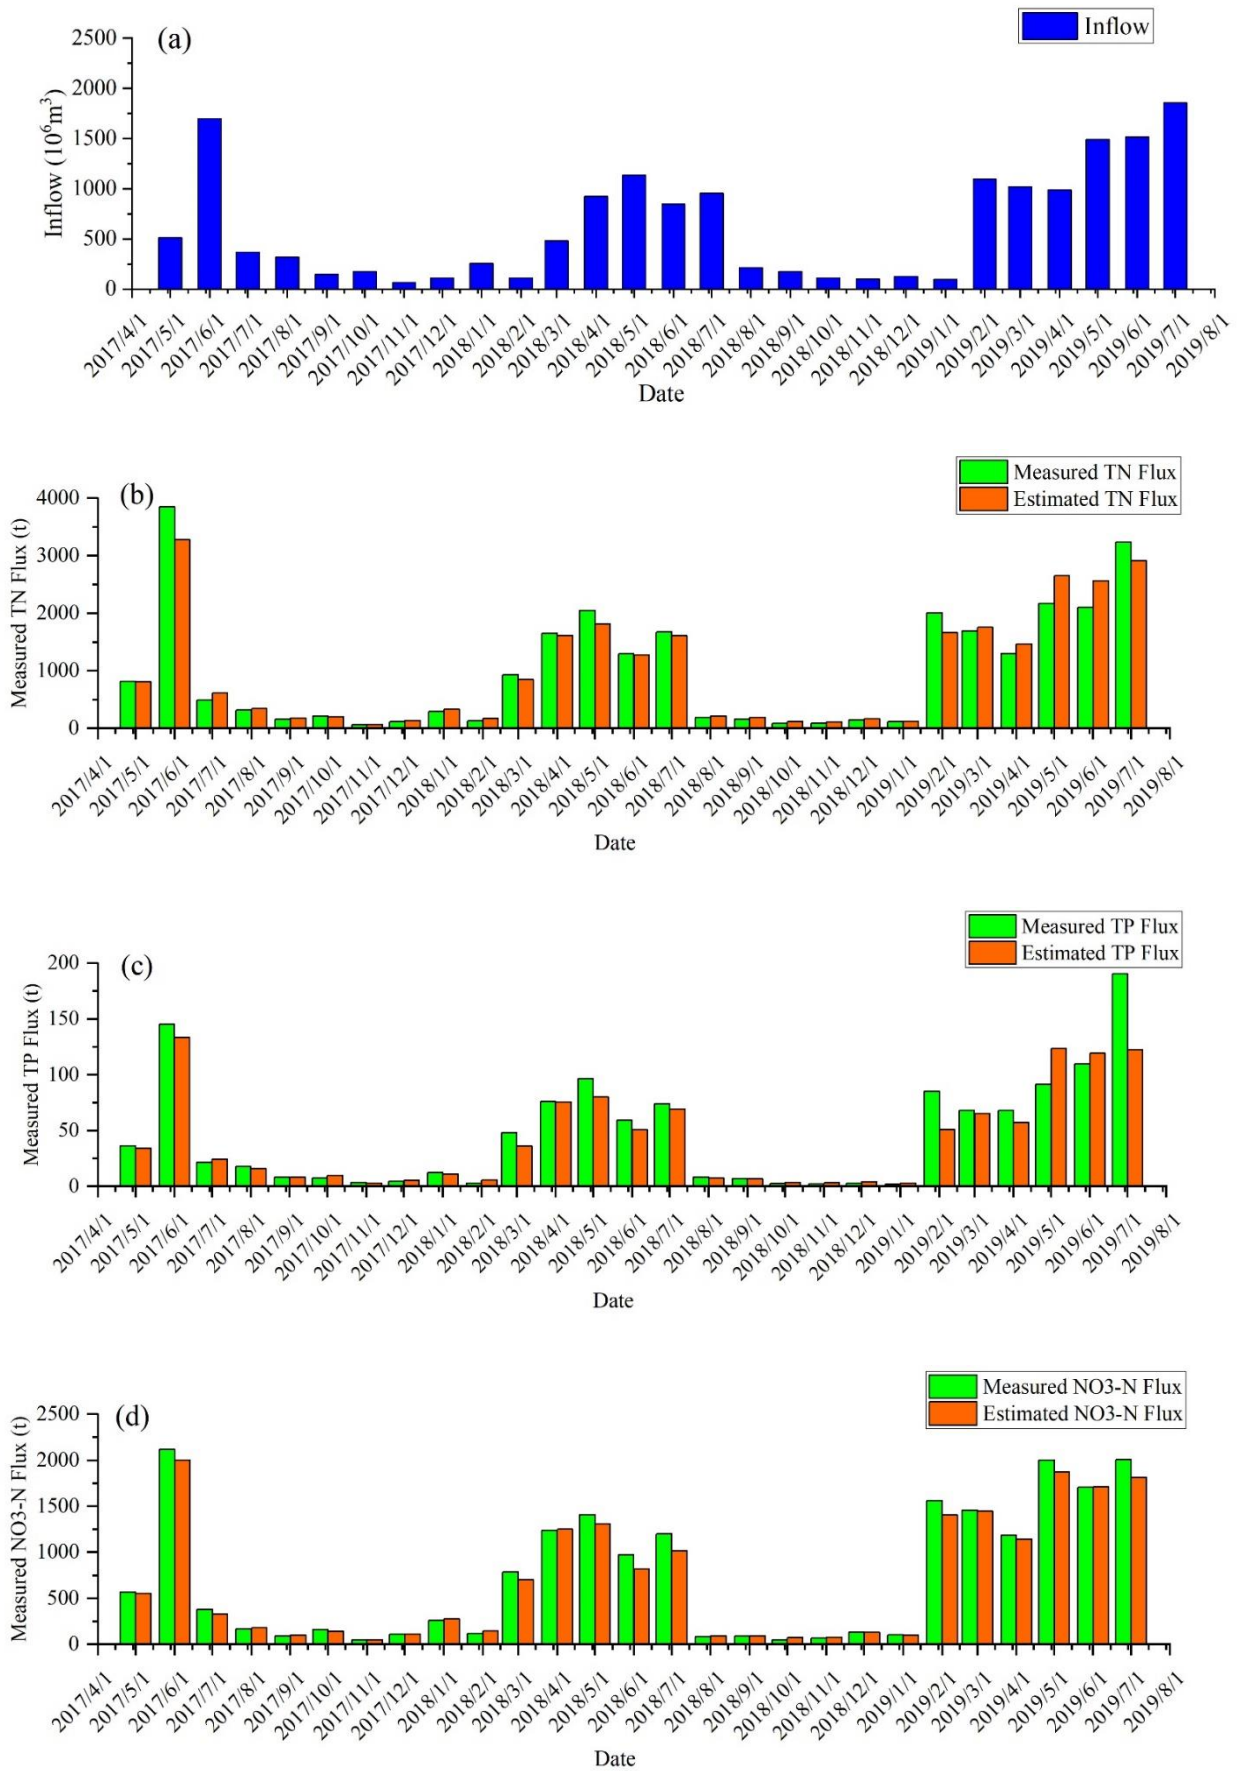

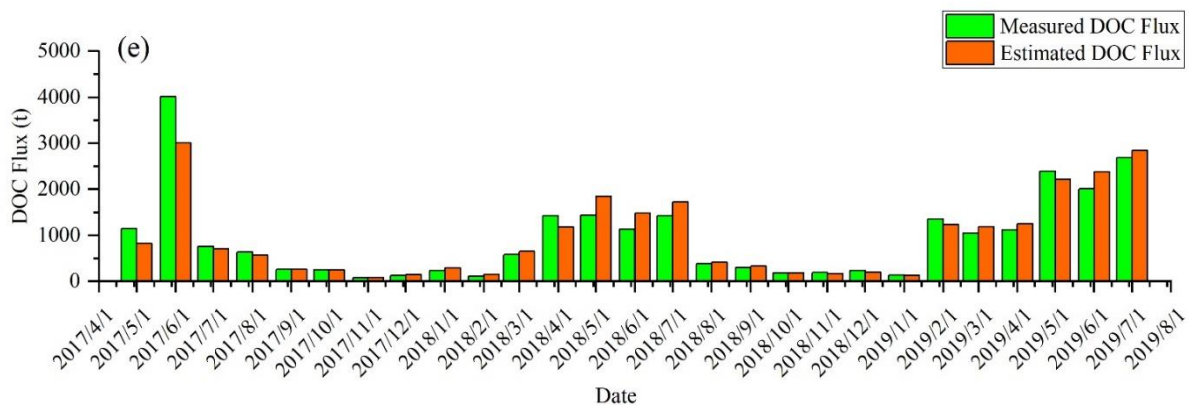

**Fig.S1** Histogram of monthly inflow and four water quality parameter flux during the experiment

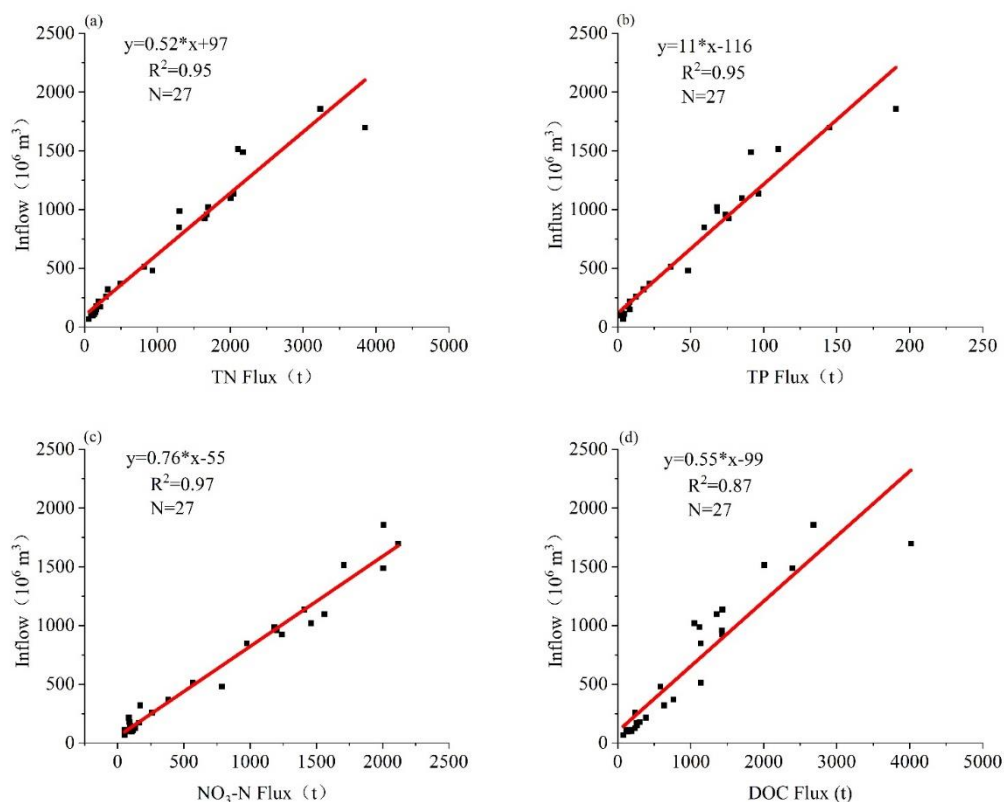

**Fig. S2** Scatter plots show the monthly inflow and monthly nutrient flux by measurements

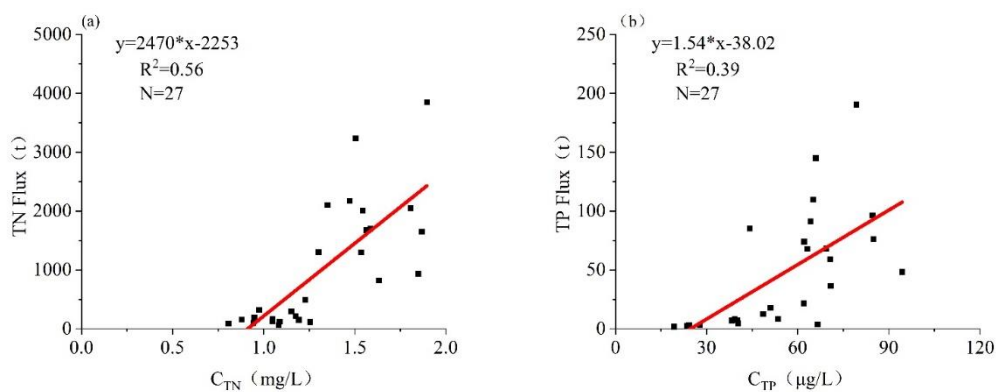

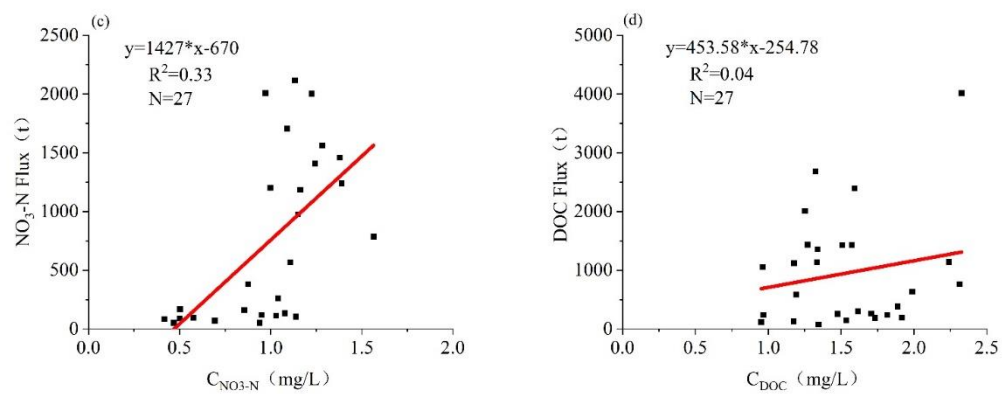

**Fig. S3** Scatter plots show the mean monthly water quality and monthly nutrient flux by measurements
